# Supplementary material
Source: MDPI journal article supplement (https://www.mdpi.com/1999-4907/14/2/259)
Supplement: s1 [file s1]

1     Supplementary Information

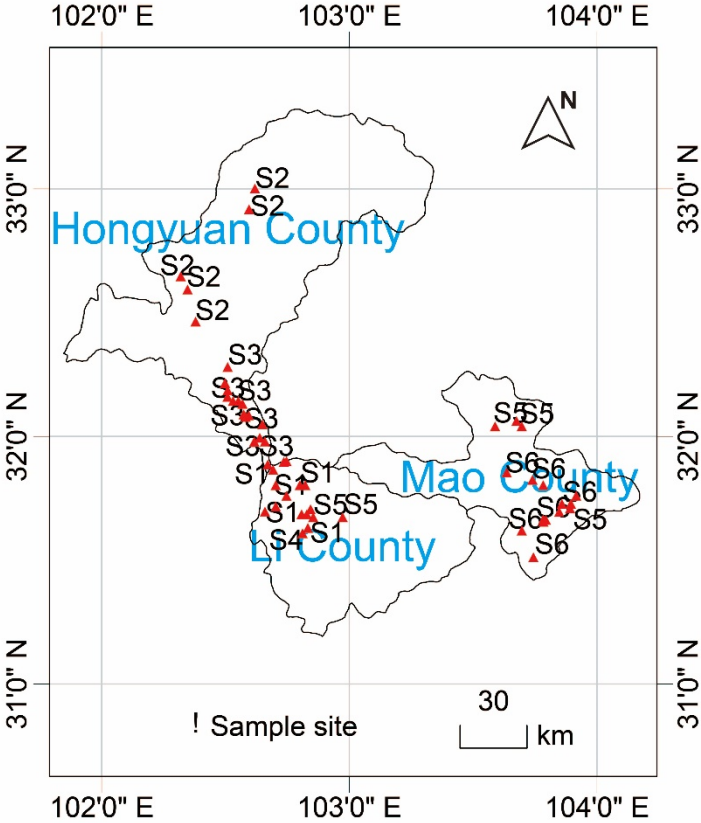

2  
3     **Figure S1.** Sample point of 6 soil types (subalpine meadow soil, S1; meadow soil, S2; dark brown soil, S3; brown  
4     soil, S4; yellow brown soil, S5; and cinnamon soil, S6).  
5

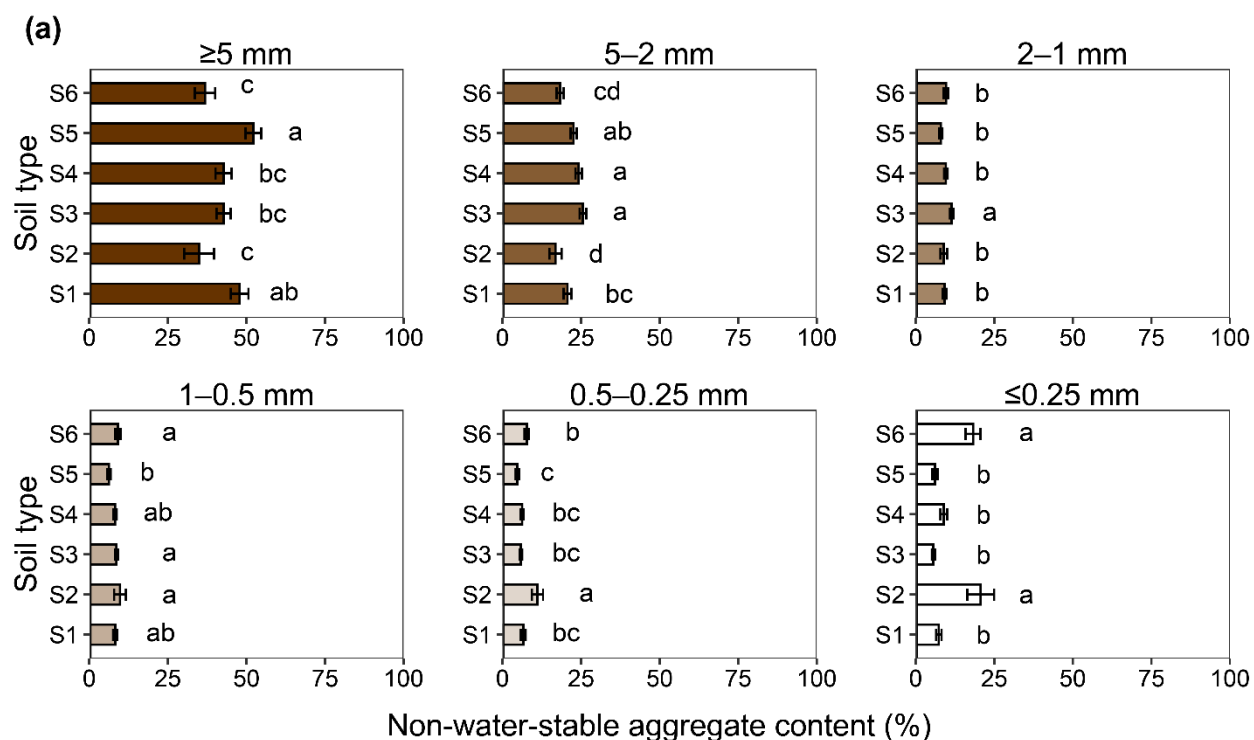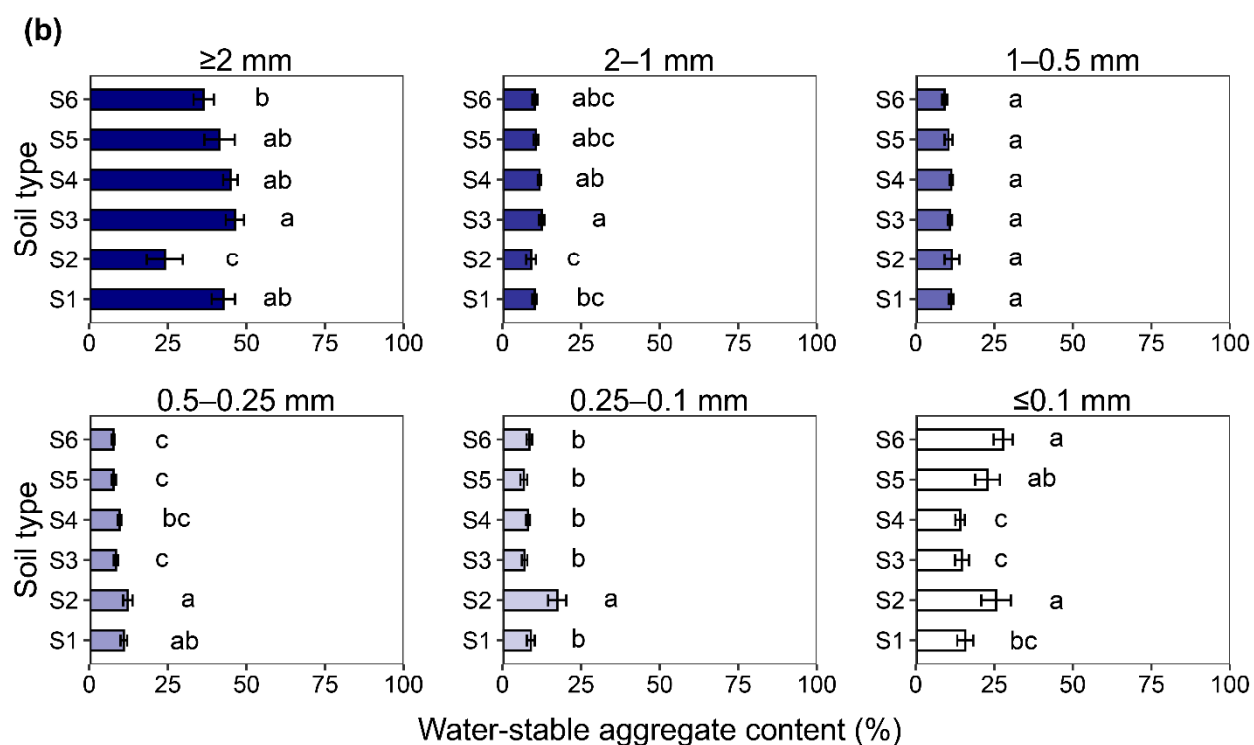

**Figure S2.** Variance analysis of non-water stable aggregate content **(a)** at 6 particle size levels (≥5 mm, 5–2 mm, 2–1 mm, 1–0.5 mm, 0.5–0.25 mm, ≤0.25 mm) and water stable aggregate content **(b)** at 6 particle size levels (≥2 mm, 2–1 mm, 1–0.5 mm, 0.5–0.25 mm, 0.25–0.1 mm, ≤0.1 mm) in 6 soil types (subalpine meadow soil, S1; meadow soil, S2; dark brown soil, S3; brown soil, S4; yellow brown soil, S5; and cinnamon soil, S6). Different lowercases indicate significant differences at  $p < 0.05$  by LSD test among soil types, and the same letters indicate no significant differences at  $p < 0.05$  by LSD test among soil types.

**Table S1.** Variance analysis of non-water stable aggregate (mean and sd) of size fraction in 6 soil types (subalpine meadow soil, S1; meadow soil, S2; dark brown soil, S3; brown soil, S4; yellow brown soil, S5; and cinnamon soil, S6). The different letters indicate significant difference at  $p<0.05$  by LSD test among 3 horizons (leaching horizon, A; sediment horizon, B; and parent material horizon, C) in the same soil types, and the same letters indicate no significant differences at  $p<0.05$  by LSD test among 3 horizons in the same soil types.

| Soil type | Horizon | Non-water stable aggregate content |             |             |              |             |              |
|-----------|---------|------------------------------------|-------------|-------------|--------------|-------------|--------------|
|           |         | ≥5 mm                              | 5-2 mm      | 2-1 mm      | 1-0.5 mm     | 0.5-0.25 mm | < 0.25 mm    |
| S1        | A       | 44.35±13.93a                       | 20.07±6.9a  | 10.34±2.07a | 9.68±3.23a   | 8.12±5.03a  | 7.45±5.42a   |
|           | B       | 45.24±8.94a                        | 22.64±3.64a | 9.53±2.34a  | 8.24±3.16a   | 6.77±3.49a  | 7.58±4.26a   |
|           | C       | 55.46±20.1a                        | 19.02±8.61a | 7.39±3.6a   | 6.46±4.28a   | 4.59±1.93a  | 7.07±4.17a   |
| S2        | A       | 31.73±8.09a                        | 21.11±6.37a | 10.91±1.1a  | 11.16±2.13a  | 11.08±4.89a | 14.01±5.39a  |
|           | B       | 35.52±23.19a                       | 15.09±9.14a | 7.26±1.63a  | 8.12±5.47a   | 9.16±7.12a  | 24.85±20.2a  |
|           | C       | 38.12±23.15a                       | 14.38±6.41a | 8.68±6.59a  | 10.05±12.11a | 13.14±9.17a | 23.26±20.62a |
| S3        | A       | 40.58±10.16a                       | 24.9±4.94a  | 12±2.16a    | 9.48±2.62a   | 6.83±2.92a  | 6.21±3.26a   |
|           | B       | 41.3±13.1a                         | 26.84±5.94a | 12.19±3.14a | 9.03±2.47a   | 5.64±1.26a  | 5±1.59a      |
|           | C       | 47.23±13.29a                       | 25±6.28a    | 9.93±2.69a  | 7.02±2.11a   | 4.99±1.38a  | 5.83±2.83a   |
| S4        | A       | 37.06±10.39a                       | 26.07±5.08a | 10.8±2.43a  | 9.44±2.47a   | 7.59±2.54a  | 9.03±4.59a   |
|           | B       | 40.75±12.07a                       | 25.74±4.77a | 10.75±2.86a | 8.25±2.48a   | 6.3±2.3a    | 8.21±4.67a   |
|           | C       | 51.22±16.32a                       | 20.59±5.53a | 7.05±2.38b  | 6.7±3.32a    | 4.71±3.04a  | 9.73±8.28a   |
| S5        | A       | 44.33±12.83b                       | 25.03±4.39a | 9.61±2.98a  | 7.73±3.32a   | 5.94±3.18a  | 7.35±4.69a   |
|           | B       | 54.7±10.45ab                       | 21.84±4.9a  | 7.2±1.86a   | 5.58±2.13a   | 4.4±2.13a   | 6.28±4.34a   |
|           | C       | 59.38±3.54a                        | 20.45±4.35a | 6.96±1.12a  | 5.06±1.61a   | 3.68±1.5a   | 4.46±2.01a   |
| S6        | A       | 29.3±9.7a                          | 19.6±6.2a   | 11.44±3.52a | 10.39±3.25a  | 8.21±3.29a  | 21.07±12.27a |
|           | B       | 39.57±19.01a                       | 16.31±4.91a | 8.59±3.5a   | 8.79±4.99a   | 8.2±4a      | 18.54±11.96a |
|           | C       | 48.76±13.23a                       | 20.39±5.13a | 8.03±2.06a  | 6.76±1.83a   | 5.35±1.4a   | 10.72±8.41a  |

**Table S2.** Variance analysis of water stable aggregate (mean and sd) of size fraction in 6 soil types (subalpine meadow soil, S1; meadow soil, S2; dark brown soil, S3; brown soil, S4; yellow brown soil, S5; and cinnamon soil, S6). The different lowercase letters indicate significant difference at  $p<0.05$  by LSD test among 3 horizons (leaching horizon, A; sediment horizon, B; and parent material horizon, C) in the same soil types, and the same letters indicate no significant differences at  $p<0.05$  by LSD test among 3 horizons in the same soil types.

| Soil type | Horizon | Water stable aggregate content |             |             |             |              |               |
|-----------|---------|--------------------------------|-------------|-------------|-------------|--------------|---------------|
|           |         | ≥2mm                           | 2-1mm       | 1-0.5 mm    | 0.5-0.25 mm | 0.25-0.1 mm  | < 0.1 mm      |
| S1        | A       | 46.28±17.34a                   | 12.13±2.73a | 12.9±2.95a  | 10.64±5.64a | 7.25±4.91a   | 10.8±7.02a    |
|           | B       | 44.58±20.56a                   | 9.2±4.27a   | 9.55±3.41a  | 11.15±6.38a | 10.45±7.14a  | 15.07±11.99a  |
|           | C       | 32.94±21.78a                   | 7.93±2.03a  | 10.83±4.78a | 11.38±4.96a | 10.28±7.44a  | 26.64±18.65a  |
| S2        | A       | 25.14±8.9a                     | 11.15±6.18a | 13.47±7.03a | 13.79±2.54a | 16.61±10.89a | 19.84±9.41a   |
|           | B       | 10.81±13.31a                   | 6.5±5.17a   | 10.51±8.38a | 12.87±5.43a | 23.18±12.88a | 36.14±18.12a  |
|           | C       | 44.76±30.27a                   | 6.98±3.5a   | 4.9±1.95a   | 6.33±2.9a   | 12.74±10.7a  | 24.29±24.95a  |
| S3        | A       | 51.07±12.92a                   | 14.98±4.35a | 12.37±3.47a | 8.05±2.66a  | 4.97±1.99a   | 8.56±4.87b    |
|           | B       | 46.15±14.06a                   | 12.23±4.52a | 11.43±2.84a | 8.74±2.96a  | 6.68±3.75a   | 14.77±12.98ab |
|           | C       | 40.02±19.45a                   | 10.03±3.32a | 8.78±4.04a  | 8.74±5.74a  | 9.84±6.56a   | 22.59±12.58a  |
| S4        | A       | 51.35±8.41a                    | 13.69±1.69a | 11.52±2.63a | 8.5±2.64a   | 6.15±2.46a   | 8.78±3.98b    |
|           | B       | 43.63±10.29a                   | 11.3±3.15a  | 11.86±2.63a | 10.14±2.03a | 8.75±3.22a   | 14.3±5.85ab   |
|           | C       | 40.31±16.86a                   | 10.43±3.15a | 10.48±3.75a | 10.13±3.74a | 9.35±3.39a   | 19.3±10.88a   |
| S5        | A       | 47±26.43a                      | 9.81±2.54a  | 8.56±4.35a  | 6.26±2.74a  | 5.96±4.29a   | 22.4±21.5a    |
|           | B       | 34.64±20.61a                   | 10.52±3.8a  | 12.26±7.83a | 8.91±3.62a  | 7.79±4.62a   | 25.88±19.19a  |
|           | C       | 41.38±17.51a                   | 11.22±4.2a  | 10.07±4.06a | 8.35±3.31a  | 7.13±7.3a    | 21.87±9a      |
| S6        | A       | 35.25±15.39a                   | 11.81±4.31a | 9.93±4.01a  | 7.41±2.03a  | 9.18±5.51a   | 26.42±11.27a  |
|           | B       | 44.72±10.2a                    | 9.75±2.32a  | 9.11±3.59a  | 7.65±2.68a  | 6.84±1.18a   | 21.93±7.18a   |
|           | C       | 38.32±16.76a                   | 10.82±1.79a | 9.13±2.76a  | 7.24±1.95a  | 6.42±1.92a   | 28.08±8.41a   |
